# Supplementary material
Source: Research Square preprint supplement (doi:10.21203/rs.3.rs-9085369/v1)
Supplement: Supplementary file 1 [file 22ed5a43368548bd14d67379.docx]

**Supplement Table 1: Institutional profile, staffing, and training programme characteristics of participating midwifery schools (N = 19)**

|  |
| --- |

|  |  | **Inst 1** | **Inst 2** | **Inst 3** | **Inst 4** | **Inst 5** | **Inst 6** | **Inst 7** | **Inst 8** | **Inst 9** | **Inst 10** | **Inst 11** | **Inst 12** | **Inst 13** | **Inst 14** | **Inst 15** | **Inst 16** | **Inst 17** | **Inst 18** | **Inst 19** |
| --- | --- | --- | --- | --- | --- | --- | --- | --- | --- | --- | --- | --- | --- | --- | --- | --- | --- | --- | --- | --- |
| Number of final year midwifery students | | 89 | 141 | 47 | 149 | 50 | 85 | 184 | 14 | 53 | 50 | 12 | 125 | 0 | 87 | 81 | 44 | 129 | 41 | 112 |
| Student admissions: 2023/24 | | 83 | 130 | 100 | 172 | 100 | 85 | 350 | 4 | 100 | 200 | 120 | 120 | 100 | 84 | 120 | 100 | 210 | 70 | 120 |
| Number of educators teaching midwifery modules | | 16 | 22 | 6 | 12 | 20 | 8 | 7 | 8 | 10 | 1 | 9 | 7 | 6 | 7 | 12 | 13 | 15 | 9 | 11 |
| Male | | 0 | 0 | 0 | 0 | 0 | 3 | 0 | 0 | 0 | 0 | 0 | 0 | 1 | 1 | 2 | 0 | 0 | 1 | 1 |
| Female | | 11 | 22 | 6 | 12 | 7 | 5 | 7 | 8 | 10 | 1 | 9 | 7 | 5 | 6 | 10 | 13 | 15 | 8 | 8 |
| Number of midwifery educators with:  Additional teaching qualifications | | 11 | 22 | 6 | 0 | 1 | 3 | 7 | 8 | 10 | 1 | 0 | 0 | 2 | 7 | 12 | 5 | 12 | 5 | 0 |
| Nursing/midwifery degree | | 11 | 22 | 6 | 12 | 5 | 3 | 7 | 8 | 10 | 1 | 9 | 2 | 2 | 7 | 12 | 10 | 12 | 5 | 7 |
| Master’s degree in nursing / midwifery | | 2 | 5 | 0 | 2 | 5 | 3 | 0 | 0 | 3 | 1 | 2 | 1 | 0 | 0 | 2 | 2 | 4 | 1 | 5 |
| Student–educator ratio | | 25 | 15 | 45 | 18 | 36 | 282 | 114 | 8 | 20 | 100 | 53 | 52 | 12 | 38 | 35 | 15 | 34 | 17 | 64 |
|  |  |  |  |  |  |  |  |  |  |  |  |  |  |  |  |  |  |  |  |  |
| Funding of institution: | State-Funded | 1 | 0 | 0 | 1 | 0 | 1 | 1 | 0 | 1 | 1 | 1 | 1 | 1 | 1 | 1 | 1 | 1 | 0 | 1 |
| Federal-Funded | 0 | 1 | 1 | 0 | 1 | 0 | 0 | 1 | 0 | 0 | 0 | 0 | 0 | 0 | 0 | 0 | 0 | 1 | 0 |
|  |  |  |  |  |  |  |  |  |  |  |  |  |  |  |  |  |  |  |  |  |
| Type of midwifery program offered: | Post-basic midwifery programme (18 months) | 0 | 1 | 0 | 0 | 1 | 0 | 0 | 1 | 0 | 0 | 1 | 1 | 0 | 0 | 0 | 0 | 0 | 0 | 1 |
| Community midwifery programme (2 years) | 0 | 1 | 0 | 1 | 0 | 0 | 1 | 0 | 1 | 1 | 1 | 1 | 1 | 1 | 0 | 0 | 1 | 0 | 1 |
| Basic midwifery programme (3 years) | 1 | 1 | 1 | 1 | 1 | 1 | 1 | 0 | 1 | 1 | 1 | 1 | 1 | 1 | 1 | 1 | 1 | 1 | 1 |
| ***Note: Inst = Institution. Institutions are presented using anonymised identifiers to protect institutional confidentiality.***  Institution 13 had no final-year students at the time of data collection. | | | | | | | | | | | | | | | | | | | | |

**Supplement table 2: Availability and reported use of digital teaching infrastructure and online platforms across participating midwifery training institutions (N = 19)**

|  | **Inst 1** | **Inst 2** | **Inst 3** | **Inst 4** | **Inst 5** | **Inst 6** | **Inst 7** | **Inst 8** | **Inst 9** | **Inst 10** | **Inst 11** | **Inst 12** | **Inst 13** | **Inst 14** | **Inst 15** | **Inst 16** | **Inst 17** | **Inst 18** | **Inst 19** |
| --- | --- | --- | --- | --- | --- | --- | --- | --- | --- | --- | --- | --- | --- | --- | --- | --- | --- | --- | --- |
| Video projectors used in teaching curriculum | 0 | 1 | 0 | 0 | 0 | 0 | 0 | 0 | 0 | 0 | 0 | 0 | 0 | 0 | 0 | 0 | 0 | 0 | 0 |
| Internet access for students to access digital/online resources (e.g. Moodle) | 1 | 0 | 1 | 0 | 1 | 1 | 0 | 0 | 0 | 1 | 0 | 0 | 0 | 0 | 0 | 0 | 0 | 0 | 0 |
| Library/computer lab with functional computers for students | 1 | 0 | 1 | 0 | 1 | 1 | 0 | 0 | 1 | 1 | 1 | 0 | 0 | 0 | 0 | 0 | 1 | 0 | 0 |
| Learning Management System (Moodle) used in teaching curriculum | 0 | 0 | 0 | 0 | 0 | 0 | 0 | 0 | 0 | 0 | 0 | 0 | 0 | 0 | 0 | 0 | 1 | 0 | 0 |
| YouTube used in teaching curriculum | 0 | 0 | 0 | 0 | 1 | 1 | 0 | 0 | 0 | 0 | 0 | 0 | 0 | 0 | 0 | 0 | 0 | 0 | 0 |
| Google or web-based search used in teaching curriculum | 0 | 0 | 0 | 0 | 1 | 1 | 0 | 0 | 0 | 0 | 0 | 0 | 0 | 0 | 0 | 0 | 0 | 0 | 0 |
| TikTok used in teaching curriculum | 0 | 0 | 0 | 0 | 1 | 1 | 0 | 0 | 0 | 0 | 0 | 0 | 0 | 0 | 0 | 0 | 0 | 0 | 0 |
| **Note: *Inst = Institution. Institutions are presented using anonymised identifiers to protect institutional confidentiality.*** | | | | | | | | | | | | | | | | | | | |

**Supplement table 3: Distribution of teaching observations and use of instructional resources during midwifery teaching sessions across participating institutions**

|  | **Inst 1** | **Inst 2** | **Inst 3** | **Inst 4** | **Inst 5** | **Inst 6** | **Inst 7** | **Inst 8** | **Inst 9** | **Inst 10** | **Inst 11** | **Inst 12** | **Inst 13** | **Inst 14** | **Inst 15** | **Inst 16** | **Inst 17** | **Inst 18** |
| --- | --- | --- | --- | --- | --- | --- | --- | --- | --- | --- | --- | --- | --- | --- | --- | --- | --- | --- |
| Number of sessions observed: | 1 | 2 | 2 | 2 | 2 | 2 | 2 | 3 | 2 | 2 | 2 | 2 | 3 | 2 | 2 | 2 | 2 | 2 |
| Teaching aids used: Visual aids | 0 | 0 | 0 | 1 | 1 | 1 | 0 | 0 | 0 | 0 | 0 | 0 | 1 | 0 | 0 | 1 | 0 | 0 |
|  | 0% | 0% | 0% | 50% | 50% | 50% | 0% | 0% | 0% | 0% | 0% | 0% | 33% | 0% | 0% | 50% | 0% | 0% |
| Flip charts | 0 | 0 | 0 | 0 | 0 | 0 | 0 | 0 | 0 | 0 | 0 | 0 | 0 | 0 | 0 | 0 | 0 | 1 |
|  | 0% | 0% | 0% | 0% | 0% | 0% | 0% | 0% | 0% | 0% | 0% | 0% | 0% | 0% | 0% | 0% | 0% | 50% |
| Models | 0 | 0 | 0 | 1 | 0 | 0 | 1 | 3 | 1 | 0 | 1 | 1 | 1 | 0 | 0 | 0 | 0 | 1 |
|  | 0% | 0% | 0% | 50% | 0% | 0% | 50% | 100% | 50% | 0% | 50% | 50% | 33% | 0% | 0% | 0% | 0% | 50% |
| Information and communication technology (ICT) used during teaching | 0 | 0 | 0 | 0 | 0 | 0 | 0 | 0 | 1 | 1 | 1 | 1 | 1 | 1 | 0 | 0 | 0 | 0 |
| 0% | 0% | 0% | 0% | 0% | 0% | 0% | 0% | 50% | 50% | 50% | 50% | 33% | 50% | 0% | 0% | 0% | 0% |
| No teaching aids used | 1 | 2 | 2 | 0 | 1 | 1 | 1 | 0 | 0 | 1 | 0 | 0 | 2 | 1 | 2 | 1 | 2 | 0 |
|  | 100% | 100% | 100% | 0% | 50% | 50% | 50% | 0% | 0% | 50% | 0% | 0% | 67% | 50% | 100% | 50% | 100% | 0% |
| Legibility of written or projected teaching materials (board, overhead, or slides) | 1 | 1 | 1 | 2 | 2 | 2 | 1 | 2 | 1 | 2 | 2 | 2 | 2 | 2 | 1 | 2 | 2 | 1 |
| 100% | 50% | 50% | 100% | 100% | 100% | 50% | 67% | 50% | 100% | 100% | 100% | 100% | 100% | 50% | 100% | 100% | 50% |
| The resource materials were handled competently | 1 | 0 | 2 | 2 | 1 | 1 | 0 | 3 | 0 | 1 | 1 | 2 | 2 | 2 | 1 | 2 | 2 | 1 |
| 100% | 0% | 100% | 100% | 100% | 100% | 0% | 100% | 0% | 100% | 100% | 100% | 100% | 100% | 100% | 100% | 100% | 50% |
| ***Inst = Institution. Values represent the number and percentage of observed teaching sessions in which each teaching aid or instructional practice was recorded. A total of 37 teaching sessions were observed across 18 institutions.*** | | | | | | | | | | | | | | | | | | |
