# Supplementary material
Source: Research Square preprint supplement (doi:10.21203/rs.3.rs-9085369/v1)
Supplement: Supplementary file 2 [file 438c576abbd98e1ff98a6a0e.docx]

**Supplementary File 1: Interview Guide for In-Depth Interviews and Focus Group Discussions**

This supplementary file contains the semi-structured interview and focus group discussion guides developed by the research team for this study. The guides were used to explore perceptions, experiences, barriers, and enabling factors related to digital learning in midwifery education in Nigeria.

1. **In-depth Interview Guide for Midwifery Educators**

SECTION 1: DIGITAL SKILLS FOR FACULTY

- Tell me what you think about the use of digital technology in the midwifery curriculum. Probes: How comfortable are you with using digital tools like emails, online learning platforms, or video calls for teaching and learning?
- How prepared do you feel as an academic/teacher to use pre-created resources?
- How about your students? Do you think they will be receptive to try new things?
- How can digital learning tools make learning more fun and interactive?
- What digital skills do you think are important for learning and which ones do you already have?
- How would you like to learn about creating new resources yourself?
- Are there any specific skills you think are relevant to digital learning and do you have any?

SECTION 2: IMPLEMENTING DIGITAL LEARNING IN THE CURRICULUM

- How can faculty be better supported using digital teaching resources? Probes: Could online, mobile-based, or self-paced learning modules help bridge the gap in digital training? Should it be short workshops, ongoing mentorship, or hands-on practice? What do you think works best?
- Have you seen or used digital learning resources that worked well in your context?

SECTION 3: POTENTIAL CHALLENGES AND SOLUTIONS

- What potential challenges should we be considering? Probes: Limited computers, unstable internet, and power shortages are common challenges; what do you think are some practical ways to work around these issues?
- How can we protect student and faculty information when using online learning platforms?
- How can digital learning be adapted to be useful for educators and students in rural settings? Probe: Would offline tools, or SMS-based learning work? What alternatives do you think are realistic?

SECTION 4: MONITORING EFFECTIVENESS

- How will we know digital learning is effective in schools? Probes: How can we tell if digital learning is working well for faculty?
- What are the best ways to check if students are actually learning and applying digital skills?
- How can we use student feedback and real-life experiences to improve assessments?

1. **In depth Interview Guide for Preceptors**

Experiences supporting midwifery education

- Briefly describe your role in supporting students during clinical learning in the hospital.
- What part of your role as a preceptor do you find enjoyable or rewarding?
- What part of your role as a preceptor do you find challenging?
- How can preceptors be supported to provide clinical learning for midwifery students during placement?

Digital learning/technology

- What are your views regarding the use of digital technology in midwifery education? Probe: online learning platforms e.g. Moodle, videos, podcasts, google/online resources
- What type of digital technology have you used if any to update your knowledge/skills in midwifery? probe: hinderances to using digital technology
- Can you share any previous experience you have had using digital/online learning platform? Probe: what device used, platform, internet materials accessed, student reaction
- In what ways can the use of digital technology be used to improve student knowledge and skills for midwifery students?
- What are the major challenges to using digital technology in midwifery education?
- Is there anything else you would like to say about preceptorship that we have not covered?

1. **Focus Group Discussion Guide for Students**
2. What are your thoughts on the use of digital technology as part of the midwifery curriculum/in your educational journey to becoming a midwife?

Probe:

Online learning platforms/virtual classrooms: group activities, lecture notes and reading materials uploaded on a learning platform e.g. Moodle, WCEA etc

Online educational resources: videos, animations, links for further reading included in class notes

Mobile learning and online tools e.g. google drive and Dropbox (enable students and teachers to work on a project)

1. What type of digital technology have you used for educational purposes during the midwifery course, If any?
2. What type of digital technology/online resources did you find most relevant in understanding midwifery modules? Probe: videos, internet materials etc.
3. What are the major challenges to using digital technology in your learning?
4. What improvements would you like to see in integrating digital technology into your midwifery program? Probe: support sessions on how to use learning platforms, how to find resources, how to participate in an online group activity, access to internet/device
5. Is there anything else you would like to say about the use of digital technology for midwifery training?
